# Supplementary material
Source: PubMed Central journal article supplement (PMC2763807)
Supplement: tableS1.pdf [file tableS1.pdf]

**Supplemental Table 1. Comparison of different types of gastric epithelial cells in the control and CKO mice.**

|                                  | Control (N=3) | <i>Nf1-Isl1-CKO</i> (N=4) |
|----------------------------------|---------------|---------------------------|
| Total cells per gland            | 37.37 ± 1.08  | 40.30 ± 1.67              |
| Parietal cells per gland         | 6.72 ± 0.25   | 5.95 ± 0.28               |
| Chief cells per gland            | 6.22 ± 0.60   | 4.41 ± 0.49               |
| Gastrin-positive cells per gland | 2.30 ± 0.32   | 1.96 ± 0.04               |

\*The number of total cells, parietal cells and chief cells per gland was measured in the corpus of the stomach, whereas the gastrin-positive cells were counted in the antrum. The average number of cells from 10 randomly selected glands was calculated for each animal. And the average of 3 control mice or 4 CKO mice was presented in the table.
